# Supplementary material
Source: PubMed Central journal article supplement (PMC2744570)
Supplement: blood-2009-01-197921_1.pdf [file blood-2009-01-197921_1.pdf]

| Cells                                         | Mean $\pm$ SD      |                         | P value |
|-----------------------------------------------|--------------------|-------------------------|---------|
|                                               | WT (n=31)          | <i>Rbm15</i> -KO (n=31) |         |
| WBC ( $\times 10^3/\mu\text{L}$ )             | 10.26 $\pm$ 2.73   | 5.33 $\pm$ 2.22         | <0.0001 |
| Neutrophils ( $\times 10^3/\mu\text{L}$ )     | 1.75 $\pm$ 0.62    | 1.18 $\pm$ 0.71         | <0.0001 |
| Lymphocytes ( $\times 10^3/\mu\text{L}$ )     | 7.88 $\pm$ 2.31    | 3.74 $\pm$ 1.64         | <0.0001 |
| Red Blood Cells ( $\times 10^6/\mu\text{L}$ ) | 8.16 $\pm$ 1.41    | 7.86 $\pm$ 1.19         | NS      |
| Hemoglobin (g/dL)                             | 12.87 $\pm$ 2.2    | 11.87 $\pm$ 1.91        | 0.0007  |
| Platelets ( $\times 10^3/\mu\text{L}$ )       | 605.58 $\pm$ 240.8 | 570.42 $\pm$ 238.3      | NS      |

NS: not significant
