# Supplementary material
Source: PubMed Central journal article supplement (PMC2744570)
Supplement: blood-2009-01-197921_2.pdf [file blood-2009-01-197921_2.pdf]

|         |               |
|---------|---------------|
| p21Cip1 | Mm00432448_m1 |
| p57Kip2 | Mm00438170_m1 |
| Gfi-1   | Mm00515853_m1 |
| c-Myc   | Mm00487803_m1 |
| Gata1   | Mm00484678_m1 |
